## THE EVOLUTION OF COVERT SIGNALING

PAUL E. SMALDINO<sup>1</sup>, THOMAS J. FLAMSON<sup>2</sup>, AND RICHARD MCELREATH<sup>3</sup>

November 6, 2017

Human sociality depends upon the benefits of mutual aid and extensive communication. However, diverse norms and preferences complicate mutual aid, and ambiguity in meaning hinders communication. Here we demonstrate that these two problems can work together to enhance cooperation through the strategic use of deliberately ambiguous signals: covert signaling. Covert signaling is the transmission of information that is accurately received by its intended audience but obscured when perceived by others. Such signals may allow coordination and enhanced cooperation while also avoiding the alienation or hostile reactions of individuals with different preferences. Although the empirical literature has identified potential mechanisms of covert signaling, such as encryption in humor, there is to date no formal theory of its dynamics. We introduce a novel mathematical model to assess when a covert signaling strategy will evolve, as well as how receiver attitudes coevolve with covert signals. Covert signaling plausibly serves an important function in facilitating within-group cooperative assortment by allowing individuals to pair up with similar group members when possible and to get along with dissimilar ones when necessary. This mechanism has broad implications for theories of signaling and cooperation, humor, social identity, political psychology, and the evolution of human cultural complexity.

**Keywords:** cooperation, signaling, social identity, ethnic markers, humor, homophily

---

<sup>1</sup>COGNITIVE AND INFORMATION SCIENCES, UNIVERSITY OF CALIFORNIA, MERCED, MERCED, CA, USA

<sup>2</sup>INDEPENDENT SCHOLAR, SACRAMENTO, CA, USA

<sup>3</sup>DEPARTMENT OF HUMAN BEHAVIOR, ECOLOGY AND CULTURE, MAX PLANCK INSTITUTE FOR EVOLUTIONARY ANTHROPOLOGY, LEIPZIG, GERMANY

*E-mail address:* paul.smaldino@gmail.com.

## INTRODUCTION

Much research on human cooperation has focused on the free-rider problem: how  
24 to maintain cooperation when individuals' interests are opposed to those of the  
group. However, individual interests are often *aligned* with those of the group,  
and these mutualistic scenarios may be equally important (Skyrms, 2004; Calcott,  
27 2008; Tomasello et al., 2012; Smaldino, 2014). But mutualism provides a different  
dilemma. When individuals differ in preferences or norms it is harder to efficiently  
coordinate. Forming reliable expectations of partner behavior that make coordina-  
30 tion possible is therefore essential for the evolution of mutualism (Schelling, 1960).

Consider, for example, a couple planning their Saturday. Chris wants to go  
to the opera; Pat wants to go to the monster truck rally. Each would rather do  
33 something together than alone, but each has a different preference (Luce & Raiffa,  
1957). If such mismatches are sufficiently frequent, Chris and Pat might be bet-  
ter off finding new partners with better-aligned interests. Successful cooperation  
36 requires resolution of this clash of preferences. Human societies are replete with  
dilemmas of this kind (Boyd & Richerson, 1994), and the need to efficiently coordi-  
nate extends to many forms of collective action (Ostrom, 2000). Institutions like  
39 punishment convert other social dilemmas into coordination dilemmas, expanding  
their importance. If individuals could assort on preferences and norms, cooperative  
payoffs may be increased. But often these traits are impossible to directly observe.  
42 When preferences consciously held, individuals can merely signal them. But often  
individuals are not conscious of their preferences or realize their relevance too late  
to signal them.

One solution is the evolution of ethnic marking. Anthropologists have long ar-  
45 gued that ethnic markers may signal group membership and improve cooperative  
outcomes (Barth, 1969). An extensive formal literature has developed exploring  
48 how arbitrary signals can facilitate assortment on unconscious norms and prefer-  
ences (Castro & Toro, 2007; Efferson et al., 2008; Mace & Holden, 2005; McElreath  
et al., 2003; Moffett, 2013; Nettle & Dunbar, 1997). Language can also serve as a  
51 marker for social coordination (Nettle & Dunbar, 1997).

Communication is implicated in all these solutions. However, much communica-  
tion is ambiguous. Is this ambiguity merely the result of constraints on the accuracy  
54 of communication? It may naïvely appear that communication should have clar-  
ity as its goal. However, purposeful ambiguity may allow signalers flexibility and  
plausible deniability (Eisenberg, 1984; Pinker et al., 2008; Santana, 2014). Previ-  
57 ous work has illustrated how leaders may use ambiguous language to rally diverse  
followers (Eisenberg, 1984), politicians may use vague platforms to avoid commit-  
ting to specific policies (Aragonès & Neeman, 2000), and suitors may mask their  
60 flirtations to be viewed innocuously if their affections are unreciprocated (Gersick  
& Kurzban, 2014).

We propose that ambiguity may enable coordination and thereby enhance coop-  
63 eration. While overt, unambiguous signals are useful in contexts where the goal is to  
delimit a group of partners with the same general norms, overt signals may foreclose  
valuable partnerships in different contexts. Signals communicate similarity but can  
66 also communicate difference, which can be damaging for within-group cooperation.  
Individuals may benefit from not foreclosing relationships with less similar group  
members, so as to successfully cooperate with them in other contexts. Although

69 any two individuals within a group can cooperate when it is mutually beneficial,  
pairs who are more similar can cooperate more effectively, generating larger ben-  
72 efits (Kaufman, 1967; Wolosin, 1975; Fischer, 2009; Hruschka, 2010; Toma et al.,  
2012). Scenarios in which individuals are unable to effectively assort on norms or  
attitudes are common, especially in complex societies (for example in business or  
75 education settings), but also in smaller societies. Pre-agricultural populations were  
likely more complex than modern foragers, who are often confined to marginal en-  
vironments (Hawks et al., 2000). A signaling system that enables group members  
to communicate relative similarity only when similarity is high while retaining a  
78 shroud of ambiguity when similarity is low could have been advantageous for much  
of human history.

*Covert signaling* is the transmission of information that is accurately received by  
81 its intended audience but obscured when perceived by others. A common example  
is “dog-whistling,” in which statements have one meaning for the public at large and  
a more specialized meaning for others (López, 2014). Such language attempts to  
84 transmit a coded message while alienating the fewest listeners possible. A possibly  
much more common form of covert signaling is humor. According to the encryption  
model of humor (Flamson & Barrett, 2008; Flamson & Bryant, 2013), a necessary  
87 component of humorous production is the presence of multiple, divergent under-  
standings of speaker meaning, some of which are dependent on access to implicit  
information. Only listeners who share access to this information can “decrypt” the  
90 implicit understandings and understand the joke. Because the successful produc-  
tion of a joke requires access to that implicit information, humor behaves in manner  
similar to “digital signatures” in computer cryptography, verifying the speaker’s ac-  
93 cess to that information without explicitly stating it. While not all humor has this  
form, a substantial amount of spontaneous, natural humor does (Flamson & Bar-  
rett, 2008; Flamson & Bryant, 2013). We allow that other types of identity signals  
96 (*sensu* Berger & Heath 2008) may be also be covert.

In the remainder of this paper, we define the logic of covert signaling. We analyze  
the conditions for covert signaling to be preferred over overt signaling, in which  
99 information about an individual’s traits is more transparent. Using a formal model,  
we show that covert signaling can be favored. It sacrifices transparency for the sake  
of maintaining working relationships with dissimilar individuals. Although covert  
102 signals are less accurate than overt signals, we show that the increased ambiguity  
can in some cases be advantageous. Covert signaling therefore may be an important  
component in explaining forms of communication and coordination such as coded  
105 speech and humor, as well as for the flexibility of human sociality more generally.  
But covert signaling is not always advantageous. For example, if it is possible to  
freely choose cooperative partners from a very large pool, overt signaling may be  
108 more advantageous, as individuals will avoid dissimilar partners and simultaneously  
reap the benefits from *knowing* that a similarity exists (Chwe, 2001). Our model also  
yields specific predictions about default attitudes toward strangers in the absence of  
111 clear signals, with implications for understanding differences between contemporary  
political affiliations.

## MODEL DESCRIPTION

114 We consider a large population of individuals who have already solved the first-  
order cooperation problem of suppressing free riders, and can instead focus on

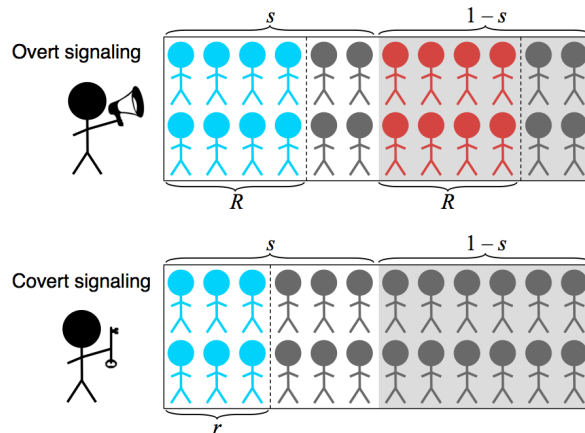

FIGURE 1. Illustration of signaling dynamics. A proportion  $s$  of the population is similar. Overt signals are received by a proportion  $R$ , and covert signals are received by  $r < R$ . Among those who receive signals, similar individuals will like the signaller (blue) and dissimilar individuals will dislike them (red). Anyone not receiving the signal will remain neutral (gray).

maximizing the benefit generated by cooperation. Although individuals all belong  
 117 to the same group, they also vary along many trait dimensions and share more in  
 common with some individuals than others. Pairs of individuals whose trait profiles  
 120 *dissimilar*. Pairs of similar individuals can more effectively coordinate and obtain  
 higher payoffs. The probability that two randomly selected individuals have similar  
 trait profiles is given by  $s$ .

123 Our model proceeds in discrete generations, with each generation subdivided  
 into two stages. In the first stage, individuals signal information about their trait  
 profiles to the other members of the group. In the second stage, individuals interact  
 126 in one of two ways and receive payoffs conditional upon attitudes formed in the first  
 stage.

**Stage 1: Signaling.** Individuals produce either an overt or covert signal of their  
 129 underlying traits. We study a family of continuous signaling strategies in which  
 covert signals are produced a fraction  $p$  of the time. Overt signals are received  
 by a fraction  $R$  of the population and explicitly signal similarity or dissimilarity.  
 132 Covert signals in contrast are received by a fraction  $r < R$  of the population and  
 have content contingent upon similarity of the sender and receiver. See Figure 1.  
 135 When the sender and receiver are similar, covert signals are received as signaling  
 similarity. Otherwise, the receiver does not notice the signal and acts as if a signal  
 was not received at all.

138 Receivers have a default attitude towards all individuals in the population and  
 update this attitude upon receiving a signal. Receiver strategy maps three signal  
 states—similar, dissimilar, no signal—to an attitude. We consider three discrete  
 attitudes: like, dislike, and neutral. These correspond to the hypothesis that covert

141 signals help individuals to avoid being disliked while also achieving sufficient positive  
 assortment by type. Two attitudes would be too few, because it would force agents  
 144 to adopt either like or dislike as a default attitude, removing any incentive for  
 covert signals. Three is the minimum required to model the hypothesis. We allow  
 a continuous family of receiver strategies. Each strategy parameter  $a_{XY}$  indicates  
 147 the probability of mapping signal  $X \in \{\text{Similar, None, Dissimilar}\}$  to attitude  $Y \in$   
 $\{\text{Like, Neutral, Dislike}\}$ . The total receiver strategy can be represented by a table:

|            | Like     | Neutral  | Dislike  |
|------------|----------|----------|----------|
| Similar    | $a_{SL}$ | $a_{SN}$ | $a_{SD}$ |
| None       | $a_{NL}$ | $a_{NN}$ | $a_{ND}$ |
| Dissimilar | $a_{DL}$ | $a_{DN}$ | $a_{DD}$ |

The three parameters in each row are constrained to sum to one.

150 **Stage 2: Interaction.** After attitudes are established, pairs of individuals interact.  
 There are two interaction contexts, each with its own mode of dyad formation.  
 In a *free choice* scenario, dyads form conditional on the attitudes of both individuals.  
 153 In contrast, in a *forced choice* scenario, an individual must seek help from  
 whomever happens to be around and dyads are not conditional upon shared attitudes.  
 Under these circumstances, it may be important not to have burned bridges,  
 156 since this will limit the likelihood of effective coordination.

In the free choice context, dyads form from joint attitudes, but attitudes do not  
 directly influence payoffs. Instead, underlying similarity influences payoffs. Specifi-  
 159 cally, similar dyads receive an average payoff of 1, establishing a baseline measure-  
 ment scale. Dissimilar dyads receive a payoff of zero. Each individual in a dyad who  
*likes* the other individual increases the proportional odds of that dyad forming by a  
 162 factor  $w_L > 1$ . For each individual who *dislikes* the other, the proportional odds of  
 the dyad forming are reduced by a factor  $w_D < 1$ . This implies five possible kinds  
 of dyads that might interact: LL, LN, NN, ND, and DD. The proportional odds of  
 165 each, relative to random assortment, are:  $w_L^2$ ,  $w_L$ , 1,  $w_D$ , and  $w_D^2$ . These parameters  
 are fixed features of the social environment, not aspects of strategy. This prevents  
 strategy dynamics from generating perfect assortment.

168 In the forced choice context, dyads form at random with respect to attitudes,  
 but attitudes do instead directly influence payoffs. This context entails a baseline  
 payoff of 1 for both individuals. However, attitudes adjust payoffs, because negative  
 171 attitudes make it harder to interact. When one individual dislikes the other, he  
 makes the interaction more difficult than it must be and thereby imposes a cost  $-d$   
 on the other individual. When both individuals dislike one another, their difficulties  
 174 act synergistically, inducing an additional cost  $-\delta$  on each. This cost could result  
 from spite or from uncontrollable inefficiency, a negative consequence of second-  
 order common knowledge (*sensu* Chwe 2001). As we show later, these synergistic  
 177 costs are very important to the overall signaling dynamics.

Let  $q$  be the relative importance of the free choice context and  $1 - q$  the relative  
 importance of the forced choice context. These two contexts are starkly different,  
 180 presenting the clearest investigation of the hypothesis that covert signals trade worse  
 performance in assortment contexts, in which norms influence payoffs, for better  
 performance in forced contexts in which attitudes influence payoffs. Real contexts  
 183 are some mix of these extremes, and the parameter  $q$  allows us to explore the range  
 of mixes.

**Payoff expression.** The expected payoff for a rare individual with signal strategy  $p'$  and receiver strategy matrix  $\mathbf{a}'$  in a population with common-type strategy  $\{p, \mathbf{a}\}$  is:

$$W(p', \mathbf{a}') = \Omega + q \Pr(\text{similar}|p', \mathbf{a}') + (1 - q)(1 - \Pr(\text{disliked}|p', \mathbf{a}'))(d + \Pr(\text{dislike}|p', \mathbf{a}')\delta) \quad (1)$$

where  $\Omega$  is an expected payoff due to other activities. The work lies in defining the probabilities  $\Pr(\text{similar}|p', \mathbf{a}')$ ,  $\Pr(\text{dislike}|p', \mathbf{a}')$ , and  $\Pr(\text{disliked}|p', \mathbf{a}')$ . In the mathematical appendix, we show how to define these probabilities, using the assumptions above. The resulting general payoff expression is very complicated. In the following section, however, we are nevertheless able to analyze it by considering invasion and stability of relevant combinations of signaling and receiver strategies.

## ANALYSIS AND RESULTS

The motivating hypothesis is that covert signals can proliferate because they allow sufficient assortment in the free choice context and also reduce being disliked in the forced choice context. To evaluate the logic of this idea, we proceed by asking when covert signals can be stable, when they can invade, and which receiver strategies are necessary for their stability or invasion. The following conditions favor covert signals.

- (1) Covert signals require a sufficient proportion of receivers to default to neutral attitudes. If everyone defaults to disliking, then covert signals can produce no benefit. Defaulting to neutral is favored under a wide range of conditions, provided that covert signals are sufficiently hard to receive ( $r$  is not too large) and avoidance of disliked individuals is not too efficient ( $w_D$  is not too small).
- (2) Covert signals require that the cost of being disliked in the forced choice context be sufficiently high. This also means that baseline similarity in the population ( $s$ ) must be sufficiently low, because this creates the risk of being disliked by dissimilar individuals.
- (3) Overt signalers cannot have too large an advantage in the free choice context. This requires that assortment with liked individuals not be too accurate. The accuracy of assortment is influenced by the reception probabilities of both signal types,  $R$  and  $r$ , as well as the proportional odds assortment factors,  $w_L$  and  $w_D$ .

In the remainder of this section, we derive these results and provide intuition for why they hold. First we derive simple evolutionary dynamics for these payoffs. This allows us to submit the model to invasion and stability analysis, asking both when covert signals can be stable and when they may invade a population of overt signals. Then we proceed by considering the dynamics within each interaction context—the forced choice context and the free choice context—separately. Then we summarize the joint dynamics of the full model with both contexts.

**Evolutionary dynamics.** We generate evolutionary dynamics for the strategy space by assuming that rare invading strategies increase in frequency when they achieve higher payoffs than a common-type strategy. We define selection gradients

for both  $p$  and the attitude parameters. The gradient for signaling is defined by:

$$g(p) = \left. \frac{\partial W(p', \mathbf{a}')}{\partial p'} \right|_{p'=p, \mathbf{a}'=\mathbf{a}} \quad (2)$$

The gradient for each receiver parameter is defined similarly. A number of different mechanisms can generate such dynamics. For example, an individual could acquire its strategy from successful individuals. Genetically coded strategies that influence biological fitness would also generate this dynamic. We remain agnostic about inheritance and transmission mechanism, because the point of our modeling exercise is to explore the design aspects of covert signals. This is best achieved by a form of analysis that abstracts away from transmission details, even though of course in any real system such details will turn out to influence which strategies are possible and how they evolve (Grafen, 1984). We also note that if the mechanism of transmission is cultural, replicators are not strictly necessary but approximate lower-fidelity transmission channels (Henrich & Boyd, 2002).

The potential space of receiver strategies is very large. However, the relevant space of strategies is fairly small. In the mathematical appendix, we show that payoff dynamics always favor mapping *similar* signals to *like* attitudes, implying  $a_{\text{SL}} = 1$ . The reason is that maximizing probability of assortment for similar individuals maximizes payoffs, and the *like* attitude maximizes the probability of interacting in the free choice context. On the other hand, payoff dynamics do not always favor mapping *dissimilar* signals to *dislike* attitudes. The reason is that the forced choice context disfavors disliking whenever  $\delta > 0$ . We therefore constrain further analysis to the relevant situations in which the penalty for mutual dislike,  $\delta$ , is small enough that assortment incentives favor mapping *dissimilar* signals to *dislike* attitudes. We reemphasize this constraint in the discussion, because constraints of this sort help in producing predictions. Finally, with respect to default attitudes, formed when no signal is received, payoff dynamics never favor assigning *like*, because this erodes the value of assigning *like* to *similar* signals.

The remaining default receiver parameters are free to evolve. Therefore, for most of the analysis to follow, we assume that  $a_{\text{SL}} = 1$ ,  $a_{\text{DD}} = 1$ ,  $a_{\text{NL}} = 0$ ,  $a_{\text{NN}} = 1 - \alpha$ , and  $a_{\text{ND}} = \alpha$ . This allows us to use the gradient on  $\alpha$ , defined by:

$$g(\alpha) = \left. \frac{\partial W(p', \alpha')}{\partial \alpha'} \right|_{p'=p, \alpha'=\alpha} \quad (3)$$

to ask when evolution favors assigning *dislike* to no signal,  $\alpha > 0$ , effectively defaulting to disliking everyone. It will be convenient to refer to  $\alpha = 0$  as the *generous receiver* strategy and  $\alpha = 1$  as the *churlish receiver* strategy.

**Dynamics of the forced choice context.** In this context, incentives favor covert signals, because such signals are better at avoiding being disliked. However, this advantage depends upon incentives favoring generous receiver strategies that do not dislike by default. Receiver incentives in this context always favor generous receiver strategies as long as there is any negative synergy,  $\delta > 0$ . Therefore the forced choice context favors generous receivers,  $\alpha = 0$ , which in turn favor covert signals,  $p = 1$ .

The gradients in this context are:

$$g(p)|_{q=0} = (\alpha rs + R(1 - \alpha - s))(d + \delta(\alpha(1 - prs) + R(1 - p)(1 - \alpha - s))) \quad (4)$$

$$g(\alpha)|_{q=0} = -\delta(1 - (1 - p)R - prs)(\alpha(1 - prs) + (1 - p)R(1 - \alpha - s)) \quad (5)$$

These expressions seem complex at first, but produce fairly simple dynamics. First let's ask when  $p$  can increase. When  $\alpha = 0$ , the generous receiver strategy is common, and covert signals can increase when:

$$d + \delta(1 - s)(1 - p)R > 0 \quad (6)$$

This is satisfied for any allowable values of the parameters. Note also that it does not require both a direct cost of being disliked,  $d$ , and a synergistic cost of mutual dislike,  $\delta$ . Either one is sufficient to favor covert signals, as long as  $\alpha$  is small. Next consider when  $\alpha = 1$ , the churlish receiver strategy is common. Then covert signals can increase when:

$$d + \delta(1 - s(pr + (1 - p)R)) < 0 \quad (7)$$

And this is never satisfied, for any  $p$ . Therefore covert signals are favored when  $1 - \alpha$ , the amount of generous receiver behavior, is sufficiently high. The threshold value is found where  $g(p) = 0$ :

$$\hat{\alpha} = \frac{1 - s}{1 - \frac{r}{R}s} \quad (8)$$

When  $\alpha$  is above this value, overt signals are favored. When it is below it, covert signals are favored. Why? When receivers are relatively generous, and there is sufficient dissimilarity in the population, covert signals reduce costs by avoiding being disliked. If generous receivers are relatively rare, however, then covert signals can actually do worse than overt signals, because they are received less often than overt signals,  $r < R$ . If  $r/R$  is sufficiently small, overt signals are favored for a wide range of values of  $\alpha$ . If however  $r = R$  and covert signals have no disadvantage in audience size, then overt signals are never favored in this context, no matter the amount of similarity  $s$ .

Now the crucial question is when  $\alpha$  will fall below this threshold  $\hat{\alpha}$ . The condition for payoff dynamics to favor smaller values of  $\alpha$ , in the forced choice context only, is just  $\delta > 0$ . Therefore the forced choice context always favors smaller values of  $\alpha$ , provided there is any negative synergy between disliking and being disliked. Otherwise  $\alpha$  is neutral and does not move at all, based on payoff dynamics. Why does this context always favor generous receivers? There is no advantage to be had in disliking people in this context, because assortment does not depend upon attitudes. Payoffs depend upon attitudes, however, and mutual dislike results in poor payoffs. Therefore, it pays to be generous in attitudes towards those one has no information about.

**Dynamics of the free choice context.** In the free choice context, attitudes influence assortment but do not directly influence payoffs. Instead, hidden norm similarity influences payoffs. The free choice context favors overt signals over covert signals, because overt signals increase assortment—such signals are easier to receive and more effectively discriminate similarity. The churlish receiver strategy,  $\alpha = 1$ , is favored by this context, because it also increases assortment with similar individuals.



Therefore this context is hostile to covert signals and to the receiver strategy that  
 303 favors them.

To support the above statements, we demonstrate that the gradient for  $p$  in this  
 context is always negative and that the gradient for  $\alpha$  in this context is always  
 306 positive. The gradients in this context are:

$$g(p)|_{q=1} = (-1) \frac{s(1-s)}{Z^2} (1 - (\alpha + (1-\alpha)(1-p)R)v_D) \\
 ((1 - \alpha v_D) + (R(1-p) + pr)(\alpha v_D + v_L)) \\
 (R(1 - \alpha v_D)(v_D + v_L) - r(1 - v_D(\alpha(1-R) + R))(\alpha v_D + v_L)) \quad (9)$$

$$g(\alpha)|_{q=1} = \frac{s(1-s)}{Z^2} (1 - w_D)(1 - (1 - w_D)(\alpha + (1-\alpha)(1-p)R)) \\
 ((1-p)R(w_L - w_D)(1 - pr - (1-p)R) + prw_L) \\
 ((1 - (1-p)R - pr)(1 - \alpha(1 - w_D)) + (R(1-p) + pr)w_L) \quad (10)$$

where  $Z$  is a normalizing term and the symbols  $v_D = 1 - w_D$  and  $v_L = w_L - 1$  are  
 used for compactness of notation. By inspection, every term after the leading  $(-1)$   
 309 in  $g(p)$  is positive, for all allowed values of the variables, and so the gradient is  
 always negative. Similarly, every term in  $g(\alpha)$  is positive, and so the gradient is  
 always positive. Therefore payoff incentives in the free choice context never favor  
 312 covert signals and always favor churlish receivers.

While this context always favors overt signalers and churlish receivers, the strength  
 of the incentives may vary. First, both gradients are proportional to the variance  
 315 in similarity,  $s(1-s)$ . This indicates that intermediate similarity more strongly  
 favors overt signals, unlike the situation in the forced choice context, in which high  
 similarity favored overt signals. The reason that the variance matters now is that  
 318 payoffs depend directly upon similarity, not upon attitudes. The more variance in  
 similarity in the population, the greater the advantage of efficient assortment.

Overt signals have the advantage in this context, because they are better at  
 321 assortment. Therefore, any change in variables that reduces the accuracy of assort-  
 ment overall will reduce overt signalers' advantage. The important variables are  $R$ ,  
 the probability an overt signal is received, and the assortment proportional odds  $w_D$   
 324 and  $w_L$ . Reducing  $R$  reduces overt signalers' advantage, because it makes signals  
 less valuable overall. Making either  $w_D$  or  $w_L$  closer to 1 makes assortment, based  
 on attitudes, less effective. This also reduces overt signalers' advantage.

**327 Joint dynamics: When do covert signals evolve?** When both contexts mat-  
 ter, the joint dynamics take on one of three characteristic regimes. First, covert  
 signals both invade and are evolutionarily stable. Second, overt signals both invade  
 330 and are evolutionary stable. Third, a mixed equilibrium exists at which covert and  
 overt signals coexist in the population. Figure 2 illustrates these three regimes.  
 These three examples all weigh the forced choice and free choice contexts equally,  
 333  $q = 0.5$ . The other parameters then shift the strength of incentives in each context  
 to influence overall dynamics. For other values of  $q$ , the strength of incentives would  
 have to shift as well to overcome weight given to each context.

336 When covert signals are sufficiently noisy ( $r/R$  low), similarity is sufficiently rare  
 ( $s$  low), and assortment ( $w_L, w_D$ ) not too efficient, covert signals can both invade  
 and are an ESS. This situation is shown in the lefthand plot. While dynamics do

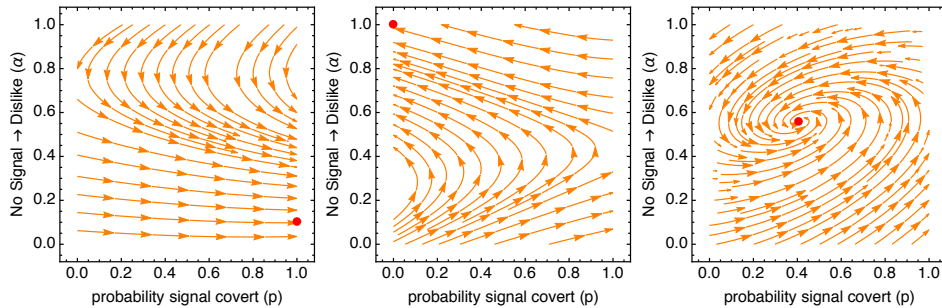

FIGURE 2. The three dynamic regimes that arise from the joint dynamics. In each plot, the paths show the evolutionary trajectories in each region of the phase space defined by the probability of covert signals ( $p$ , horizontal) and the probability of churlish receivers ( $\alpha$ , vertical). The red points show equilibria. In all three plots:  $d = 0.1$ ,  $\delta = 0.01$ ,  $q = 0.5$ . Left:  $s = 0.1$ ,  $r/R = 0.25$ ,  $w_L = 1.1$ ,  $w_D = 0.9$ . Middle: Same as left, but  $w_D = 0.6$ . Right:  $s = 0.2$ ,  $r/R = 0.75$ ,  $w_L = 1.25$ ,  $w_D = 0.8$ .

339 not favor covert signals when  $\alpha$  is large, near the top of the phase space, dynamics  
 in that region favor smaller values of  $\alpha$ . Eventually,  $\alpha$  becomes small enough to  
 342 allow covert signals to invade and reach fixation. In many cases, a small amount of  
 churlish receiver strategy,  $\alpha > 0$ , persists.

When the conditions outlined above are not met, incentives favor instead overt  
 signals. The middle plot illustrates a case essentially the opposite of the one on the  
 345 left. Here,  $w_D = 0.6$ , making assortment efficient. When assortment is efficient, it  
 may pay to dislike by default. This sets up a dynamic that eventually favors overt  
 signals. While covert signals are still favored when  $\alpha$  is low, the fact that larger  
 348 values of  $\alpha$  are favored everywhere leads eventually to invasion and fixation of overt  
 signals.

Finally, the plot on the right shows an intermediate case, in which conditions  
 351 favor both signaling strategies. Here  $s = 0.2$ ,  $r/R = 0.75$ ,  $w_L = 1.25$ , and  $w_D = 0.8$ .  
 In this regime, the conditions that favor covert signals also favor more churlish  
 receivers. Similarly, the conditions that favor overt signals also favor fewer churlish  
 354 receivers. In total, the population comes to rest with a mixture of signaling and  
 receiving strategies.

A more general view of the dynamics is available by considering the boundary  
 357 conditions that make covert signaling an ESS. Recall that  $q$  is the relative importance  
 of free choice scenarios. Define a threshold  $\hat{q}$  as the largest value of  $q$  for  
 which covert signals can resist invasion by overt signals. This is defined by values  
 360 of  $q = \hat{q}$  and  $\alpha = \hat{\alpha}$  that satisfy  $g(p)|_{p=1} = 0$  and  $g(\alpha)|_{p=1} = 0$ . These cannot  
 in general be solved analytically. So we solve the system numerically, in order to  
 illustrate the range of joint dynamics. Values of  $q$  less than  $\hat{q}$  make covert signals  
 363 evolutionarily stable—overt signals cannot invade. Values of  $q$  greater than  $\hat{q}$  allow  
 overt signals to invade, though we note that covert signals may nevertheless remain  
 in the population, at an internal stable value  $p$ . Therefore  $\hat{q}$  provides a useful metric  
 366 of how strongly a parameter configuration favors covert signals.

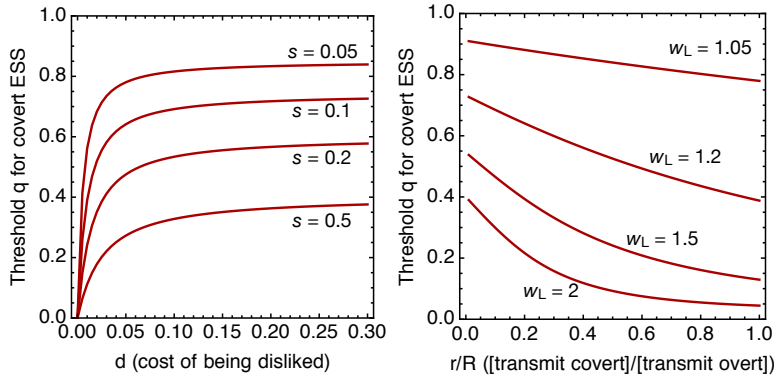

FIGURE 3. Plots of the largest value of  $q$ ,  $\hat{q}$ , that allows covert signaling to be an ESS. Each curve represents a set of parameter values. Points below each curve make covert signals unininvadable by overt signals. Points above each curve allow overt signaling to invade. Left: The cost of being disliked,  $d$ , for four values of the baseline rate of similarity,  $s$ .  $r/R = 0.5$ ,  $w_L = 1.1$ ,  $w_D = 0.9$ , and  $\delta = 0.01$ . Right: The ratio of covert transmission rate,  $r$ , to the rate of overt transmission rate,  $R$ , for four values of  $w_L = 1/w_D$ .  $s = 0.1$ ,  $R = 0.5$ ,  $d = 0.1$ , and  $\delta = 0.01$ .

We use  $\hat{q}$  to summarize the tradeoffs in the signaling model. Recall that the cost of being disliked,  $d$ , is needed to favor covert signals. Therefore increasing  $d$  makes it easier for covert signals to be an ESS. However, the rate of similarity,  $s$ , favors overt signals. It is of value to note that  $d$  cannot compensate for  $s$ —if  $s$  is large, then steeply increasing costs  $d$  will not favor covert signals. We show this relationship in Figure 3, lefthand plot. Each curve in this plot is a threshold  $\hat{q}$ , below which covert signaling is an ESS. For each level of  $s$ , the impact of increasing  $d$  diminishes rapidly. Therefore some cost  $d$  is necessary for covert signals to evolve and be stable, but these costs cannot easily compensate when similarity is sufficiently common.

Consider another important pair of dimensions: the ratio of transmission rates  $r/R$  in covert/overt signals and the efficiency of assortment, as measured by  $w_L$  and  $w_D$ . Figure 3, righthand side, shows  $\hat{q}$  curves for four values of  $w_L = 1/w_D$ , as functions of  $r/R$ . Covert signals are favored when  $r/R$  is small, as explained in the previous sections. But when assortment is very efficient, such as  $w_L = 2$  near the bottom of the plot, it requires very low values of  $r/R$  to compensate in favor of overt signaling.

## DISCUSSION

The dynamics of cooperation are more complicated than implied by models in which maximal benefits accrue to those who can simply avoid free riders. Individuals vary, making assortment among cooperators important. Circumstances also vary. When individuals must occasionally collaborate with those outside their circles of friends, it can be critical to avoid burning bridges with dissimilar members of one's group. Covert signaling makes this possible, and this may be why phenomena like

390 humor are observed in all human societies, at both small and large scales (Apte,  
1985; Brown, 1991).

393 We have shown that covert signaling is favored when forced choice scenarios  
are common, when similarity is low, when the cost of being disliked is high, and  
396 when covert signals are sufficiently noisy to make the meaning of a signal's absence  
ambiguous. We emphasize that covert signaling can be favored even though it is less  
effective than overt signaling at communicating similarity, because it simultaneously  
399 avoids communicating dissimilarity. Although we have focused our attention on the  
initial establishment of cooperative relationships via signaling, we also note that  
people can change over time, may grow more similar to one another or further apart.  
Covert signals may be important for the continued maintenance of a relationship,  
or for its reestablishment after prolonged absence.

402 Our model points to interesting transitions from inter- to intra-group assortment  
dynamics. As noted, overt signaling systems are favored when the ability to assort  
on attitudes is high, and when being disliked by dissimilar individuals carries little  
405 risk. This is precisely the kind of situation that is assumed to obtain in inter-group  
assortment, where overt signals such as ethnic markers are used to discriminate  
between similar and dissimilar individuals. In these between-group contexts, the  
408 difference between similar and dissimilar individuals is so great that attempting  
to coordinate with dissimilar others is not worth the effort, and one can afford to  
burn bridges with them in order to ensure that similar others are aware of their  
411 similarity (McElreath et al., 2003). In fact, it might be argued that burning bridges  
with dissimilar out-group members is as much a goal of overt signals like ethnic  
markers as is attracting similar in-group members.

414 Intra-group assortment, however, is not simply a matter of scaling down inter-  
group dynamics. Rather, we must already presume some baseline level of similarity  
417 resulting from inter-group assortment; for there to be a group within which to assort,  
some degree of similarity should already be in place that defines that group, such as  
the shared interaction norms, communication systems, etc. that ethnic markers are  
thought to ensure. The benefits of further assorting on the basis of more nuanced  
420 similarity are therefore likely to be marginal relative to random assortment within  
the group. When such benefits are small but the costs of being disliked are high,  
covert signaling is favored.

423 Relatedly, we emphasize that the probability of similarity,  $s$ , need not reflect  
some number of discrete types in the population, but can instead refer to a level  
of selectivity in how much a pair of individuals must have in common to be con-  
426 sidered "similar." That is,  $s$  refers to the proportion of the population that could  
be considered similar to a focal individual in a given context, with higher values  
indicating a looser concept of "similar" than lower ones. Changes to  $s$  can have  
429 a significant impact on the overall dynamics of the system. When  $s$  is large, the  
focus is on avoiding rare dissimilar individuals, and overt signals will be favored.  
As  $s$  decreases, the criteria for considering a potential partner sufficiently similar to  
432 reap the benefits of enhanced coordination become stricter, and the utility of covert  
signals increases.

435 An interesting direction for future exploration is how these dynamics might re-  
spond to increased social complexity. In the larger and more complex societies  
associated with the development of agriculture, and particularly in the last few  
centuries, interactions with strangers are more frequent and occur across many

438 contexts, necessitating strategies for temporary assortment (Johnson & Earle, 2000;  
Smaldino, 2018). Consequently, expected similarity will be lower, signal fidelity will  
441 be noisier, and assortment on attitudes will be less efficient. These are precisely  
the conditions in our model associated with the evolution of covert signaling. In  
large, diverse populations, covert signaling may sustain social cohesion and prevent  
burning bridges between individuals or groups that must occasionally collaborate.  
444 That said, covert signals are not necessarily rare in small-scale societies. Our own  
experiences in the field and conversations with other researchers indicate that they  
occur with some regularity. Our model can help to identify contexts in which covert  
447 signaling should or should not be expected.

Identity signaling, whether overt social markers or more covert communication,  
can be used by individuals looking to find others similar to themselves and to  
450 avoid being mistaken for something they are not (Berger & Heath, 2008; Smaldino,  
2018). If the need to cooperate with dissimilar individuals is unlikely or if similar  
individuals are common, then overt declarations of identity should be expected. On  
453 the other hand, if burning bridges is both costly and likely given an overt signaling  
strategy, we should expect identity to be signaled much more subtly. In reality,  
increasing levels of specificity may be signaled in increasingly covert ways, and  
456 without all received signals actively inducing a change in disposition toward the  
sender. A related signaling strategy, not covered by our model, might facilitate  
liking between similar individuals but only indifference otherwise. Casual, coarse-  
459 grain identity signaling may often take this form, as in cases of fashion adoption  
or pop culture allegiances. It would be interesting to investigate how common  
these “semi-covert” signals are in small-scale communities, as they seem pervasive  
462 in complex industrialized societies.

Our model additionally helps make sense of findings from political psychology  
suggesting that people in the industrialized West who identify as conservative or  
465 right-leaning tend to view ambiguous people as hostile, while those identifying as  
liberal or left-leaning tend view ambiguous people as neutral (Vigil, 2010; Hibbing  
et al., 2014; Holbrook et al., 2016). In our model, a default attitude to dislike was  
468 linked with overt signaling, which we in turn associate with the preservation of  
strong between-group boundaries. In contrast, a default attitude of neutral was as-  
sociated with covert signaling, and with the avoidance of burned bridges to facilitate  
471 more widespread within-group cooperation. As a broad generalization, our analysis  
suggests that conservatives may be operating under the assumptions of stronger in-  
group/outgroup boundaries, increased expectations of similarity toward those they  
474 signal, and lower costs to being disliked by dissimilar individuals. In contrast, lib-  
erals may be operating under the assumptions of a more broadly defined ingroup,  
limited expectations for similarity toward those they signal, and higher costs to  
477 being disliked by dissimilar individuals. Lending modest support to this idea is the  
finding that conservatives appear to have a stronger “need for cognitive closure”  
(reviewed in Hibbing et al., 2014), which is associated with, among other things, a  
480 distaste for uncertainty and ambiguity. The modeling framework we present in this  
paper may thus be useful in understanding patterns of differences between groups,  
including but not limited to political affiliation.

483 Ours is the first model of covert signaling. As such, it necessarily involves simpli-  
fying assumptions concerning the nature of signaling and cooperative assortment.  
For example, while we have allowed for covert signaling errors in the form of failed

486 transmission to similar individuals, we have not included the converse form of error,  
where dissimilar individuals *are* able to detect the signal some of the time, and there-  
489 fore update their disposition to disliking the covert signaler. Adding an additional  
parameter to account for this possibility does not qualitatively change our analysis.  
But it may create conditions where a non-signaling “quiet” strategy could invade.  
492 In addition, we ignore the possibility of strategic action on the part of the receiver  
to either improve coordination or to avoid partnering with dissimilar individuals  
entirely. We assumed that a pairing of dissimilar partners would simply lead to an  
495 unsuccessful collaboration, but such a pairing might instead lead each individual to  
pursue more individualistic interests. At the population level, we assumed that all  
498 individuals had an equal probability of encountering similar individuals, and that  
all similar and dissimilar individuals were equivalent. In reality, some individuals  
501 may be more or less likely to encounter similar individuals, perhaps related to dif-  
ferences in the tendency to be conformity- versus distinctiveness-seeking (Smaldino  
& Epstein, 2015), or reflecting minority-majority dynamics (Wimmer, 2013). Ex-  
ploration of this variation opens the door to evaluating signaling and assortment  
strategies in stratified groups. All of these limitations provide avenues for future  
research that will build upon the central findings reported here.

504 In a population where individuals vary and burning bridges is costly, overtly  
announcing precisely where one stands entails venturing into a zone of danger.  
Covert signaling, as in the case of humor or otherwise encrypted language, allows  
507 individuals to effectively assort when possible while avoiding burned bridges when  
the situation calls for partnerships of necessity.

#### ACKNOWLEDGMENTS

510 Thanks to Patrick Barclay, William Baum, John Bunce, and three anonymous  
reviewers for helpful comments. This work was supported by National Science  
Foundation Grant BCS 1357240 (to T.F. and R.M.) and by the Division of Social  
513 Sciences Dean’s Office at the University of California Davis.

#### REFERENCES

- Apte, M. (1985). *Humor and laughter: An Anthropological Approach*. Ithaca, NY:  
516 Cornell University Press.
- Aragonès, E. & Neeman, Z. (2000). Strategic ambiguity in electoral competition.  
*Journal of Theoretical Politics*, 12(2), 183–204.
- 519 Barth, F. (1969). Introduction. In F. Barth (Ed.), *Ethnic Groups and Boundaries*  
(pp. 9–38). New York: Little, Brown.
- Berger, J. & Heath, C. (2008). Who drives divergence? identity signaling, outgroup  
522 dissimilarity, and the abandonment of cultural tastes. *Journal of Personality and*  
*Social Psychology*, 95(3), 593.
- Boyd, R. & Richerson, P. J. (1994). The evolution of norms: An anthropological  
525 view. *Journal of Institutional and Theoretical Economics*, 150(1), 72–87.
- Brown, D. (1991). *Human universals*. Philadelphia: Temple University Press.
- Calcott, B. (2008). The other cooperation problem: Generating benefit. *Biology*  
528 *and Philosophy*, 23(2), 179–203.
- Castro, L. & Toro, M. A. (2007). Mutual benefit cooperation and ethnic cultural  
diversity. *Theoretical Population Biology*, 71(3), 392–399.

- 531 Chwe, M. S.-Y. (2001). *Rational Ritual: Culture, Coordination, and Common Knowledge*. Princeton University Press.
- Efferson, C., Lalive, R., & Fehr, E. (2008). The coevolution of cultural groups and  
534 ingroup favoritism. *Science*, *321*(5897), 1844–1849.
- Eisenberg, E. M. (1984). Ambiguity as strategy in organizational communication.  
*Communication Monographs*, *51*(3), 227–242.
- 537 Fischer, I. (2009). Friend or foe: Subjective expected relative similarity as a de-  
terminant of cooperation. *Journal of Experimental Psychology: General*, *138*,  
341–350.
- 540 Flamson, T. & Barrett, H. (2008). The encryption theory of humor: A knowledge-  
based mechanism of honest signaling. *Journal of Evolutionary Psychology*, *6*(4),  
261–281.
- 543 Flamson, T. J. & Bryant, G. A. (2013). Signals of humor: Encryption and laughter  
in social interaction. In M. Dynel (Ed.), *Developments in Linguistic Humour  
Theory*, volume 1 (pp. 49–73). Amsterdam: John Benjamins Publishing.
- 546 Gersick, A. & Kurzban, R. (2014). Covert sexual signaling: Human flirtation and  
implications for other social species. *Evolutionary Psychology*, *12*(3), 549–569.
- Grafen, A. (1984). Natural selection, kin selection and group selection. In J. Krebs &  
549 N. B. Davies (Eds.), *Behavioural ecology: An evolutionary approach* (pp. 62–84).  
Blackwell.
- Hawks, J., Hunley, K., Lee, S.-H., & Wolpoff, M. (2000). Population bottlenecks  
552 and pleistocene human evolution. *Molecular Biology and Evolution*, *17*, 2–22.
- Henrich, J. & Boyd, R. (2002). On modeling cognition and culture: Why cultural  
evolution does not require replication of representations. *Journal of Cognition  
and Culture*, *2*, 87–111.
- 555 Hibbing, J. R., Smith, K. B., & Alford, J. R. (2014). Differences in negativity  
bias underlie variations in political ideology. *Behavioral and Brain Sciences*, *37*,  
558 297–350.
- Holbrook, C., López-Rodríguez, L., Fessler, D. M. T., Vázquez, A., & Gómez, A.  
(2016). Gulliver’s politics: Conservatives envision potential enemies as readily  
561 vanquished and physically small. *Social Psychological and Personality Science*.
- Hruschka, D. J. (2010). *Friendship: Development, ecology, and evolution of a  
relationship*. Berkeley: University of California Press.
- 564 Johnson, A. W. & Earle, T. K. (2000). *The Evolution of Human Societies: From  
Foraging Group to Agrarian State*. Stanford University Press.
- Kaufman, H. (1967). Similarity and cooperation received as determinants of coop-  
567 eration rendered. *Psychonomic Science*, *9*, 73–74.
- López, I. H. (2014). *Dog Whistle Politics: How Coded Racial Appeals Have Rein-  
vented Racism & Wrecked the Middle Class*. Oxford University Press.
- 570 Luce, R. D. & Raiffa, H. (1957). *Games and Decisions*. Wiley.
- Mace, R. & Holden, C. J. (2005). A phylogenetic approach to cultural evolution.  
*Trends in Ecology and Evolution*, *20*(3), 116–121.
- 573 McElreath, R., Boyd, R., & Richerson, P. J. (2003). Shared norms and the evolution  
of ethnic markers. *Current Anthropology*, *44*(1), 122–130.
- Moffett, M. W. (2013). Human identity and the evolution of societies. *Human  
576 Nature*, *24*(3), 219–267.
- Nettle, D. & Dunbar, R. (1997). Social markers and the evolution of reciprocal  
exchange. *Current Anthropology*, *38*, 93–99.

- 579 Ostrom, E. (2000). Collective action and the evolution of social norms. *The Journal of Economic Perspectives*, 14(3), 137–158.
- Pinker, S., Nowak, M. A., & Lee, J. J. (2008). The logic of indirect speech. *Proceedings of the National Academy of Sciences*, 105(3), 833–838.
- 582 Santana, C. (2014). Ambiguity in cooperative signaling. *Philosophy of Science*, 81, 398–422.
- 585 Schelling, T. C. (1960). *The Strategy of Conflict*. Harvard University Press.
- Skyrms, B. (2004). *The Stag Hunt and the Evolution of Social Structure*. Cambridge University Press.
- 588 Smaldino, P. E. (2014). The cultural evolution of emergent group-level traits. *Behavioral and Brain Sciences*, 37, 243–295.
- Smaldino, P. E. (2018). The evolution of the social self: Multidimensionality of social identity solves the coordination problems of a society. In A. C. Love & W. C. Wimsatt (Eds.), *Beyond the Meme: Development and Structure in Cultural Evolution*. University Minnesota Press.
- 591
- 594 Smaldino, P. E. & Epstein, J. M. (2015). Social conformity despite individual preferences for distinctiveness. *Royal Society Open Science*, 2(3), 140437.
- Toma, C., Corneille, O., & Yzerbyt, V. (2012). Holding a mirror up to the self: Egocentric similarity beliefs underlie social projection in cooperation. *Personality and Social Psychology Bulletin*, 38, 1259–1271.
- 597
- 600 Tomasello, M., Melis, A. P., Tennie, C., Wyman, E., & Herrmann, E. (2012). Two key steps in the evolution of human cooperation. *Current Anthropology*, 53(6), 673–692.
- Vigil, J. M. (2010). Political leanings vary with facial expression processing and psychosocial functioning. *Group Processes & Intergroup Relations*, 13(5), 547–558.
- 603
- Wimmer, A. (2013). *Ethnic Boundary Making: Institutions, Power, Networks*. Oxford University Press.
- 606
- Wolosin, R. J. (1975). Cognitive similarity and group laughter. *Journal of Personality and Social Psychology*, 32, 503–509.



609

## APPENDIX (ONLINE SUPPLEMENT) The Evolution of Covert Signaling

### APPENDIX A. MODEL DERIVATION

612 **A.1. Payoff expressions.** As explained in the main text, we can define a general payoff expression for an individual with strategy  $p'$  and attitude matrix  $\mathbf{a}'$  in a population with strategy  $\{p, \mathbf{a}\}$ . This expression is:

$$W(p', \mathbf{a}') = \Omega + q \Pr(\text{similar}|p', \mathbf{a}') + (1 - q)(1 - \Pr(\text{Disliked}|p', \mathbf{a}')d - \Pr(\text{Disliked}|p', \mathbf{a}') \Pr(\text{Dislike}|p', \mathbf{a}')\delta) \quad (11)$$

615 where  $\Omega$  is an expected baseline payoff due to other activities.

**A.2. Context 1 probabilities.**  $\Pr(\text{similar}|p', \mathbf{a}')$  is the probability of ending up in a similar dyad, given the focal has signaling strategy  $\{p', \mathbf{a}'\}$ . By definition:

$$\Pr(\text{similar}|p', \mathbf{a}') = \Pr(\text{LL}|p', \mathbf{a}') \Pr(\text{similar}|\text{LL}, p', \mathbf{a}') + \Pr(\text{LN}|p', \mathbf{a}') \Pr(\text{similar}|\text{LN}, p', \mathbf{a}') + \Pr(\text{NN}|p', \mathbf{a}') \Pr(\text{similar}|\text{NN}, p', \mathbf{a}')$$

618 The terms like  $\Pr(\text{similar}|\text{NN}, p', \mathbf{a}')$  are defined by conditional probability:

$$\Pr(\text{similar}|\text{NN}, p', \mathbf{a}') = \frac{\Pr(\text{similar}, \text{NN}|p', \mathbf{a}')}{\Pr(\text{NN}|p')}$$

Defining the two terms on the right requires defining probabilities for dyad formation.

The probability that an LL dyad forms is:

$$\Pr(\text{LL}|p', \mathbf{a}') = \frac{p(\text{LL}|p', \mathbf{a}')w_L^2}{Z}$$

621 where the denominator  $Z$  normalizes the probability and  $p(\text{LL}|p', \mathbf{a}')$  is the raw proportion of dyads that are LL, post signaling. Under the baseline receiver strategy,  $\mathbf{a}'$ , it is defined as:

$$p(\text{LL}|p', \mathbf{a}') = s(p'pr^2 + (p'(1 - p) + (1 - p')p)rR + (1 - p')(1 - p)R^2)$$

624 While we later develop this expression in general for all receiver strategies, it's worth consider the specific expression above, for sake of comprehension. To understand this expression, consider that LL dyads must comprise similar individuals, and both signals have to be received for the attitudes to form. Individuals are similar  $s$  of the time. There are three ways this can happen: (1) both individuals signal covertly  $p'p$  of the time, (2) one individual signals covertly and the other overtly  $p'(1 - p) + (1 - p')p$  of the time, or (3) both individuals signal overtly  $(1 - p')(1 - p)$  of the time. In all three cases, both signals must be received. Probabilities for each of the other dyad types—LN, NN, ND, and DD—are defined similarly. Further down, we define all of these probabilities in general, using a more algorithmic approach.

633 The denominator  $Z$  normalizes the probabilities of each dyad forming. It is merely the sum of all of the numerators in the probabilities of different types of dyads. These other probabilities are defined similarly:

$$\begin{aligned} \Pr(\text{LN}|p', \mathbf{a}') &= p(\text{LN}|p', \mathbf{a}')w_L/Z \\ \Pr(\text{LD}|p', \mathbf{a}') &= p(\text{LD}|p', \mathbf{a}')w_Lw_D/Z \\ \Pr(\text{NN}|p', \mathbf{a}') &= p(\text{NN}|p', \mathbf{a}')/Z \\ \Pr(\text{ND}|p', \mathbf{a}') &= p(\text{ND}|p', \mathbf{a}')w_D/Z \\ \Pr(\text{DD}|p', \mathbf{a}') &= p(\text{DD}|p', \mathbf{a}')w_D^2/Z \end{aligned}$$

**A.3. Building generalized probabilities.** Now we construct the general probabilities that comprise the payoff expression by using a table of interactions.

| [1]Focal | [2]Other | [3]Sim | [4]Signals | [5]Probability of dyad    | [6]FL     | [7]FN     | [8]FD     | [9]OL    | [10]ON   | [11]OD   |
|----------|----------|--------|------------|---------------------------|-----------|-----------|-----------|----------|----------|----------|
| <i>C</i> | <i>C</i> | 1      | 11         | $p'psr^2$                 | $a'_{SL}$ | $a'_{SN}$ | $a'_{SD}$ | $a_{SL}$ | $a_{SN}$ | $a_{SD}$ |
| <i>C</i> | <i>C</i> | 1      | 10         | $p'psr(1-r)$              | $a'_{SL}$ | $a'_{SN}$ | $a'_{SD}$ | $a_{SL}$ | $a_{SN}$ | $a_{SD}$ |
| <i>C</i> | <i>C</i> | 1      | 01         | $p'ps(1-r)r$              | $a'_{SL}$ | $a'_{SN}$ | $a'_{SD}$ | $a_{SL}$ | $a_{SN}$ | $a_{SD}$ |
| <i>C</i> | <i>C</i> | 1      | 00         | $p'ps(1-r)^2$             | $a'_{SL}$ | $a'_{SN}$ | $a'_{SD}$ | $a_{SL}$ | $a_{SN}$ | $a_{SD}$ |
| <i>C</i> | <i>C</i> | 0      | 11         | $p'p(1-s)r^2$             | $a'_{NL}$ | $a'_{NN}$ | $a'_{ND}$ | $a_{NL}$ | $a_{NN}$ | $a_{ND}$ |
| <i>C</i> | <i>C</i> | 0      | 10         | $p'p(1-s)r(1-r)$          | $a'_{NL}$ | $a'_{NN}$ | $a'_{ND}$ | $a_{NL}$ | $a_{NN}$ | $a_{ND}$ |
| <i>C</i> | <i>C</i> | 0      | 01         | $p'p(1-s)(1-r)r$          | $a'_{NL}$ | $a'_{NN}$ | $a'_{ND}$ | $a_{NL}$ | $a_{NN}$ | $a_{ND}$ |
| <i>C</i> | <i>C</i> | 0      | 00         | $p'p(1-s)(1-r)^2$         | $a'_{NL}$ | $a'_{NN}$ | $a'_{ND}$ | $a_{NL}$ | $a_{NN}$ | $a_{ND}$ |
| <i>C</i> | <i>O</i> | 1      | 11         | $p'(1-p)srR$              | $a'_{YL}$ | $a'_{YN}$ | $a'_{YD}$ | $a_{YL}$ | $a_{YN}$ | $a_{YD}$ |
| <i>C</i> | <i>O</i> | 1      | 10         | $p'(1-p)sr(1-R)$          | $a'_{YL}$ | $a'_{YN}$ | $a'_{YD}$ | $a_{YL}$ | $a_{YN}$ | $a_{YD}$ |
| <i>C</i> | <i>O</i> | 1      | 01         | $p'(1-p)s(1-r)R$          | $a'_{YL}$ | $a'_{YN}$ | $a'_{YD}$ | $a_{YL}$ | $a_{YN}$ | $a_{YD}$ |
| <i>C</i> | <i>O</i> | 1      | 00         | $p'(1-p)s(1-r)(1-R)$      | $a'_{YL}$ | $a'_{YN}$ | $a'_{YD}$ | $a_{YL}$ | $a_{YN}$ | $a_{YD}$ |
| <i>C</i> | <i>O</i> | 0      | 11         | $p'(1-p)(1-s)rR$          | $a'_{DL}$ | $a'_{DN}$ | $a'_{DD}$ | $a_{DL}$ | $a_{DN}$ | $a_{DD}$ |
| <i>C</i> | <i>O</i> | 0      | 10         | $p'(1-p)(1-s)r(1-R)$      | $a'_{DL}$ | $a'_{DN}$ | $a'_{DD}$ | $a_{DL}$ | $a_{DN}$ | $a_{DD}$ |
| <i>C</i> | <i>O</i> | 0      | 01         | $p'(1-p)(1-s)(1-r)R$      | $a'_{DL}$ | $a'_{DN}$ | $a'_{DD}$ | $a_{DL}$ | $a_{DN}$ | $a_{DD}$ |
| <i>C</i> | <i>O</i> | 0      | 00         | $p'(1-p)(1-s)(1-r)(1-R)$  | $a'_{DL}$ | $a'_{DN}$ | $a'_{DD}$ | $a_{DL}$ | $a_{DN}$ | $a_{DD}$ |
| <i>O</i> | <i>C</i> | 1      | 11         | $(1-p')psRr$              | $a'_{SL}$ | $a'_{SN}$ | $a'_{SD}$ | $a_{SL}$ | $a_{SN}$ | $a_{SD}$ |
| <i>O</i> | <i>C</i> | 1      | 10         | $(1-p')psR(1-r)$          | $a'_{SL}$ | $a'_{SN}$ | $a'_{SD}$ | $a_{SL}$ | $a_{SN}$ | $a_{SD}$ |
| <i>O</i> | <i>C</i> | 1      | 01         | $(1-p')ps(1-R)r$          | $a'_{SL}$ | $a'_{SN}$ | $a'_{SD}$ | $a_{SL}$ | $a_{SN}$ | $a_{SD}$ |
| <i>O</i> | <i>C</i> | 1      | 00         | $(1-p')ps(1-R)(1-r)$      | $a'_{SL}$ | $a'_{SN}$ | $a'_{SD}$ | $a_{SL}$ | $a_{SN}$ | $a_{SD}$ |
| <i>O</i> | <i>C</i> | 0      | 11         | $(1-p')p(1-s)Rr$          | $a'_{DL}$ | $a'_{DN}$ | $a'_{DD}$ | $a_{DL}$ | $a_{DN}$ | $a_{DD}$ |
| <i>O</i> | <i>C</i> | 0      | 10         | $(1-p')p(1-s)R(1-r)$      | $a'_{DL}$ | $a'_{DN}$ | $a'_{DD}$ | $a_{DL}$ | $a_{DN}$ | $a_{DD}$ |
| <i>O</i> | <i>C</i> | 0      | 01         | $(1-p')p(1-s)(1-R)r$      | $a'_{DL}$ | $a'_{DN}$ | $a'_{DD}$ | $a_{DL}$ | $a_{DN}$ | $a_{DD}$ |
| <i>O</i> | <i>C</i> | 0      | 00         | $(1-p')p(1-s)(1-R)(1-r)$  | $a'_{DL}$ | $a'_{DN}$ | $a'_{DD}$ | $a_{DL}$ | $a_{DN}$ | $a_{DD}$ |
| <i>O</i> | <i>O</i> | 1      | 11         | $(1-p')(1-p)sR^2$         | $a'_{SL}$ | $a'_{SN}$ | $a'_{SD}$ | $a_{SL}$ | $a_{SN}$ | $a_{SD}$ |
| <i>O</i> | <i>O</i> | 1      | 10         | $(1-p')(1-p)sR(1-R)$      | $a'_{SL}$ | $a'_{SN}$ | $a'_{SD}$ | $a_{SL}$ | $a_{SN}$ | $a_{SD}$ |
| <i>O</i> | <i>O</i> | 1      | 01         | $(1-p')(1-p)s(1-R)R$      | $a'_{SL}$ | $a'_{SN}$ | $a'_{SD}$ | $a_{SL}$ | $a_{SN}$ | $a_{SD}$ |
| <i>O</i> | <i>O</i> | 1      | 00         | $(1-p')(1-p)s(1-R)^2$     | $a'_{SL}$ | $a'_{SN}$ | $a'_{SD}$ | $a_{SL}$ | $a_{SN}$ | $a_{SD}$ |
| <i>O</i> | <i>O</i> | 0      | 11         | $(1-p')(1-p)(1-s)R^2$     | $a'_{DL}$ | $a'_{DN}$ | $a'_{DD}$ | $a_{DL}$ | $a_{DN}$ | $a_{DD}$ |
| <i>O</i> | <i>O</i> | 0      | 10         | $(1-p')(1-p)(1-s)R(1-R)$  | $a'_{DL}$ | $a'_{DN}$ | $a'_{DD}$ | $a_{DL}$ | $a_{DN}$ | $a_{DD}$ |
| <i>O</i> | <i>O</i> | 0      | 01         | $(1-p')(1-p)(1-s)(1-R)R$  | $a'_{DL}$ | $a'_{DN}$ | $a'_{DD}$ | $a_{DL}$ | $a_{DN}$ | $a_{DD}$ |
| <i>O</i> | <i>O</i> | 0      | 00         | $(1-p')(1-p)(1-s)(1-R)^2$ | $a'_{DL}$ | $a'_{DN}$ | $a'_{DD}$ | $a_{DL}$ | $a_{DN}$ | $a_{DD}$ |

639 The columns of this table specify:

- (1) The focal individual's signaling strategy
- (2) The other individual's signaling strategy
- 642 (3) Whether or not (0/1) the individual's are similar
- (4) Whether or not (0/1) focal/other signals are received by the other individual in the pair. 11 indicates that both signals are received. 10 indicates that focal's signal was received, while other's signal was not.
- 645 (5) The probability of this pairing and pair of signal reception events
- (6) The probability that the focal individual forms attitude L. When a signal is received from a similar individual, this is  $a'_{SL}$ . When no signal is received or a covert signal is received from a dissimilar individual, this is  $a'_{NL}$ . When an overt signal is received from a dissimilar individual, this is  $a'_{DL}$ .
- 648 (7) The probability that the focal individual forms attitude N
- (8) The probability that the focal individual forms attitude D
- (9) The probability that the other individual forms attitude L
- 654 (10) The probability that the other individual forms attitude N
- (11) The probability that the other individual forms attitude D

Parameters marked by a prime, such as  $p'$  and  $a'_{SL}$ , indicate aspects of the focal individual's strategy, to be contrasted with population values. Again, we refer to the vector of attitude parameters with  $\mathbf{a}$ .

660 Call this table  $\mathbf{M}$ . To compute probabilities, we multiply specific terms in each row and then sum these products down the rows. For example, the probability that the focal individual and a random individual mutually like one another,  $p(\text{LL}|p', \mathbf{a}')$ , is defined by:

$$p(\text{LL}|p', \mathbf{a}') = \sum_{i=1}^{32} \mathbf{M}_{i,5} \mathbf{M}_{i,6} \mathbf{M}_{i,9} \quad (12)$$

The other probabilities are defined similarly:

$$p(\text{LN}|p', \mathbf{a}') = \sum_{i=1}^{32} \mathbf{M}_{i,5} (\mathbf{M}_{i,6} \mathbf{M}_{i,10} + \mathbf{M}_{i,7} \mathbf{M}_{i,9}) \quad (13)$$

$$p(\text{LD}|p', \mathbf{a}') = \sum_{i=1}^{32} \mathbf{M}_{i,5} (\mathbf{M}_{i,6} \mathbf{M}_{i,11} + \mathbf{M}_{i,8} \mathbf{M}_{i,9}) \quad (14)$$

$$p(\text{NN}|p', \mathbf{a}') = \sum_{i=1}^{32} \mathbf{M}_{i,5} \mathbf{M}_{i,7} \mathbf{M}_{i,10} \quad (15)$$

$$p(\text{ND}|p', \mathbf{a}') = \sum_{i=1}^{32} \mathbf{M}_{i,5} (\mathbf{M}_{i,7} \mathbf{M}_{i,11} + \mathbf{M}_{i,8} \mathbf{M}_{i,10}) \quad (16)$$

$$p(\text{DD}|p', \mathbf{a}') = \sum_{i=1}^{32} \mathbf{M}_{i,5} \mathbf{M}_{i,8} \mathbf{M}_{i,11} \quad (17)$$

663 To derive probabilities of similarity and attitudes, all that is required is to multiply each of the products above with the corresponding value in column 3. This defines:

$$\Pr(\text{sim, LL}|p', \mathbf{a}') = \sum_{i=1}^{32} \mathbf{M}_{i,3} \mathbf{M}_{i,5} \mathbf{M}_{i,6} \mathbf{M}_{i,9} \quad (18)$$

$$\Pr(\text{sim, LN}|p', \mathbf{a}') = \sum_{i=1}^{32} \mathbf{M}_{i,3} \mathbf{M}_{i,5} (\mathbf{M}_{i,6} \mathbf{M}_{i,10} + \mathbf{M}_{i,7} \mathbf{M}_{i,9}) \quad (19)$$

$$\Pr(\text{sim, LD}|p', \mathbf{a}') = \sum_{i=1}^{32} \mathbf{M}_{i,3} \mathbf{M}_{i,5} (\mathbf{M}_{i,6} \mathbf{M}_{i,11} + \mathbf{M}_{i,8} \mathbf{M}_{i,9}) \quad (20)$$

$$\Pr(\text{sim, NN}|p', \mathbf{a}') = \sum_{i=1}^{32} \mathbf{M}_{i,3} \mathbf{M}_{i,5} \mathbf{M}_{i,7} \mathbf{M}_{i,10} \quad (21)$$

$$\Pr(\text{sim, ND}|p', \mathbf{a}') = \sum_{i=1}^{32} \mathbf{M}_{i,3} \mathbf{M}_{i,5} (\mathbf{M}_{i,7} \mathbf{M}_{i,11} + \mathbf{M}_{i,8} \mathbf{M}_{i,10}) \quad (22)$$

$$\Pr(\text{sim, DD}|p', \mathbf{a}') = \sum_{i=1}^{32} \mathbf{M}_{i,3} \mathbf{M}_{i,5} \mathbf{M}_{i,8} \mathbf{M}_{i,11} \quad (23)$$

All that remains are probabilities that any random individual Likes or Dislikes the focal:

$$\Pr_{\mathbf{F}}(\text{L}|p', \mathbf{a}') = \sum_{i=1}^{32} \mathbf{M}_{i,5} \mathbf{M}_{i,9} \quad (24)$$

$$\Pr_{\mathbf{F}}(\text{D}|p', \mathbf{a}') = \sum_{i=1}^{32} \mathbf{M}_{i,5} \mathbf{M}_{i,11} \quad (25)$$

666 as well as the probabilities that the focal likes or dislikes the other individual:

$$\Pr_{\mathbf{O}}(\text{L}|p', \mathbf{a}') = \sum_{i=1}^{32} \mathbf{M}_{i,5} \mathbf{M}_{i,6} \quad (26)$$

$$\Pr_{\mathbf{O}}(\text{D}|p', \mathbf{a}') = \sum_{i=1}^{32} \mathbf{M}_{i,5} \mathbf{M}_{i,8} \quad (27)$$
